# Supplementary material for: Caribbean multi-centre study of Klebsiella pneumoniae: whole-genome sequencing, antimicrobial resistance and virulence factors
Source: PubMed Central journal article supplement (PMC6562249; doi:10.1099/mgen.0.000266), 2019-04-29

## **Caribbean multi-centre study of *Klebsiella pneumoniae*: whole genome sequencing, antimicrobial resistance and virulence factors.**

Eva Heinz<sup>1,2\*</sup>, Richard Brindle<sup>3,4</sup>, Andrina Morgan-McCalla<sup>3,5</sup>, Keisha Peters<sup>3</sup>, Nicholas R. Thomson<sup>1,6</sup>

1: Wellcome Trust Sanger Institute, Hinxton, UK

2: Liverpool School of Tropical Medicine, Liverpool, UK

3: Caribbean Public Health Agency, Port of Spain, Trinidad & Tobago

4: University of Bristol, Bristol, UK

5: University of the West Indies, Mona, Jamaica

6: London School of Hygiene and Tropical Medicine, London, UK

\*Correspondence: [eva.heinz@lstmed.ac.uk](mailto:eva.heinz@lstmed.ac.uk)

**Supplementary data**

**Figure S1: Numbers of all orally (A) and peritoneal (B) prescribed antibiotics reported in the PPS.**

# Figure S1

**(A)**

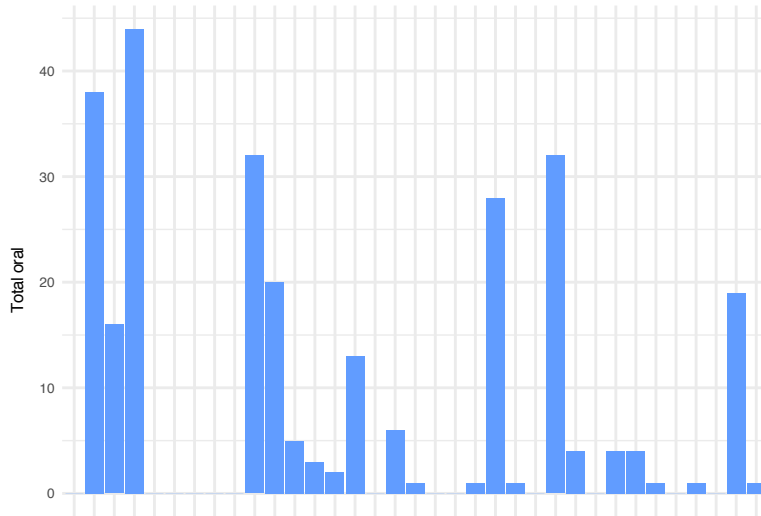

**(B)**

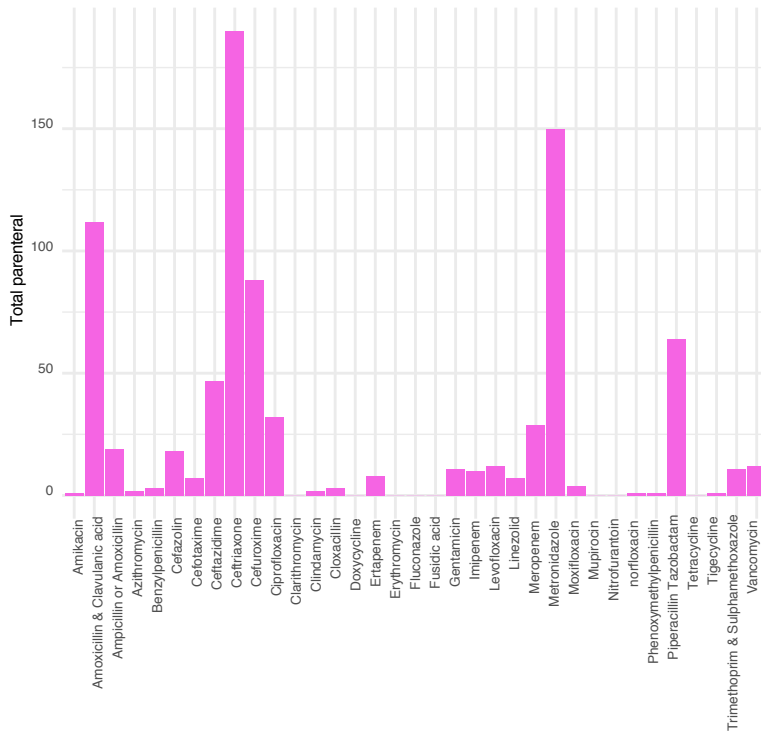

**Figure S2: Core genome analysis of *K. quasipneumoniae* subsp. *similipneumoniae* isolates.** Phylogenetic tree of the isolates (left) and corresponding pairwise SNP distances in a heatmap (right).



**Figure S3: Antimicrobial resistance gene alleles for all analysed genomes in this study.**

Figure S3

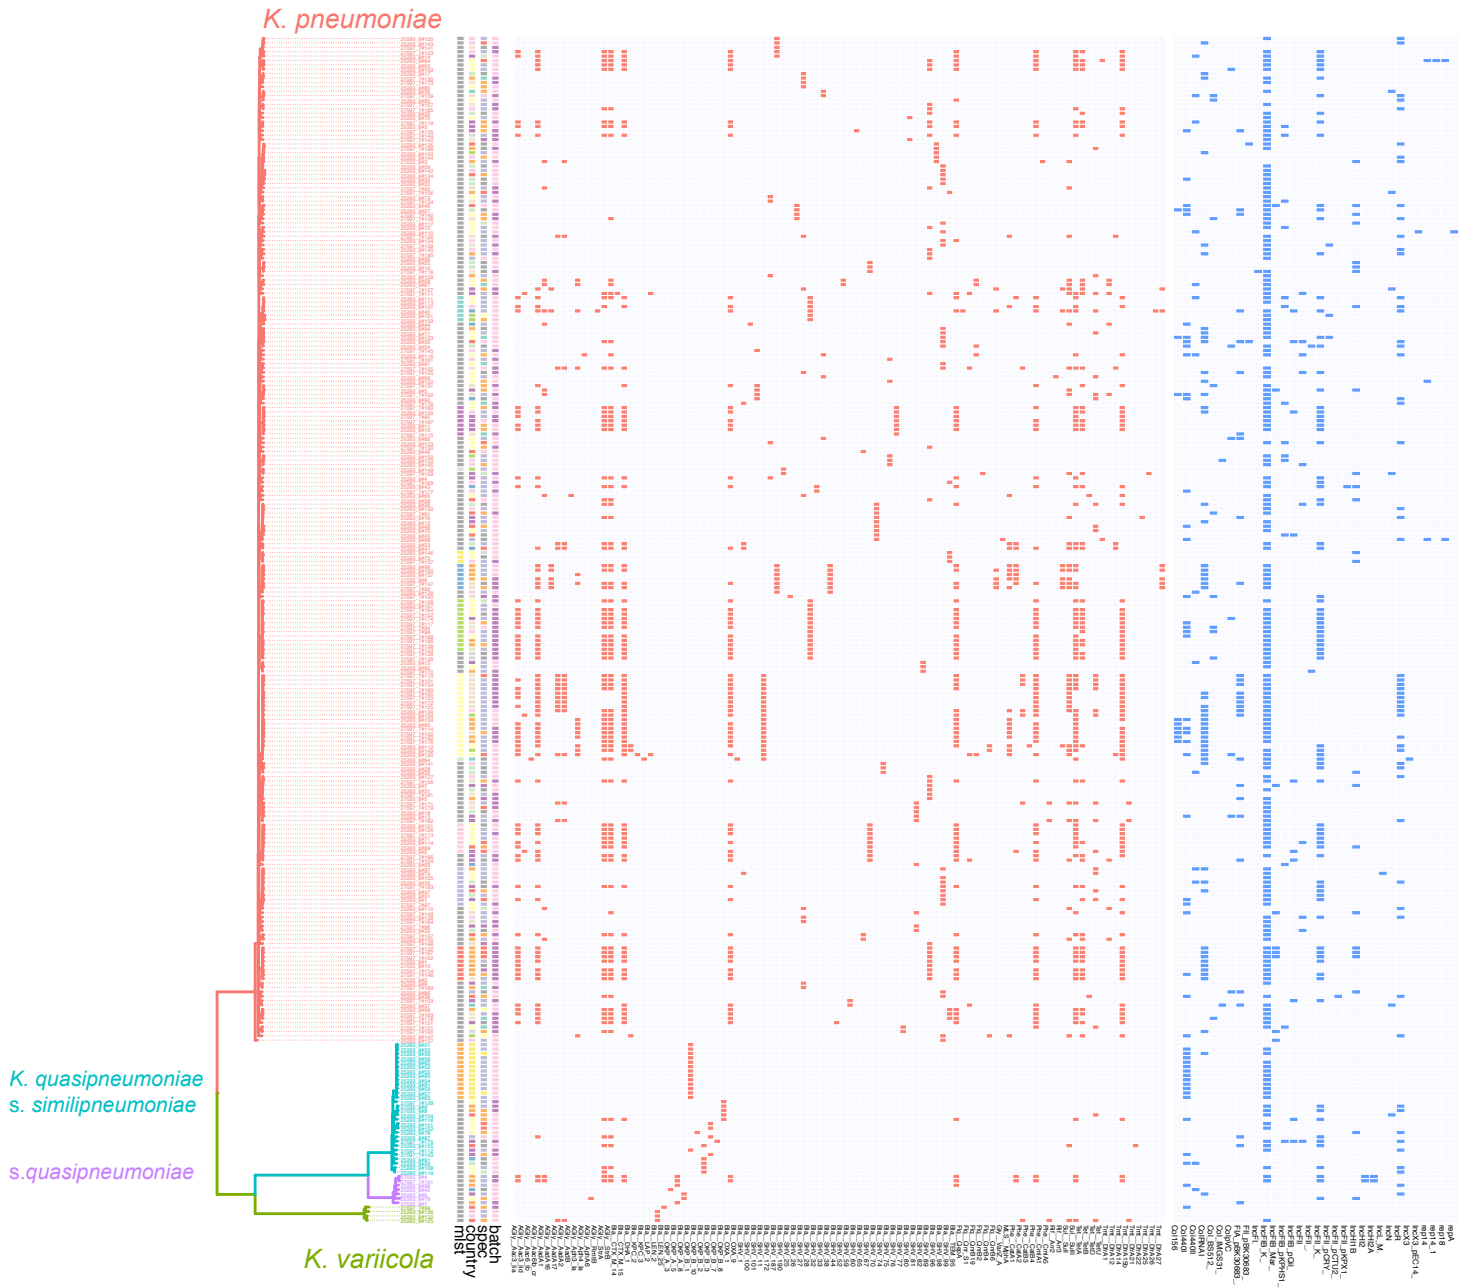

| Main STs | Country | Specimen      | Batch |                          |
|----------|---------|---------------|-------|--------------------------|
| 15       | 1       | Blood         | 1     | AMR genes present        |
| 11       | 2       | Urine         | 2     | Plasmid replicon present |
| 258      | 3       | Wound         |       |                          |
| 45       | 4       | Abscess       |       |                          |
| 39       | 5       | Liver abscess |       |                          |
| 152      | 6       | Sputum        |       |                          |
| 23       | 7       | CSF           |       |                          |
| 307      | 8       | Ear           |       |                          |
| 392      | 9       | Vaginal       |       |                          |
| 405      | 10      | Pus           |       |                          |
| 86       | 11      | Other         |       |                          |
| 1605     | 12      |               |       |                          |
|          | 13      |               |       |                          |

**Figure S4: Core genome analysis for main antimicrobial resistant, globally spread STs.** Mapping tree (left) in the context of public data and the corresponding pairwise SNP distances after removing recombination shown as heatmap (right) for **(A) ST11, (B) ST15, (C) ST307, (D) ST405**. The published strains included in the analyses are given in Dataset S2.



Figure S4

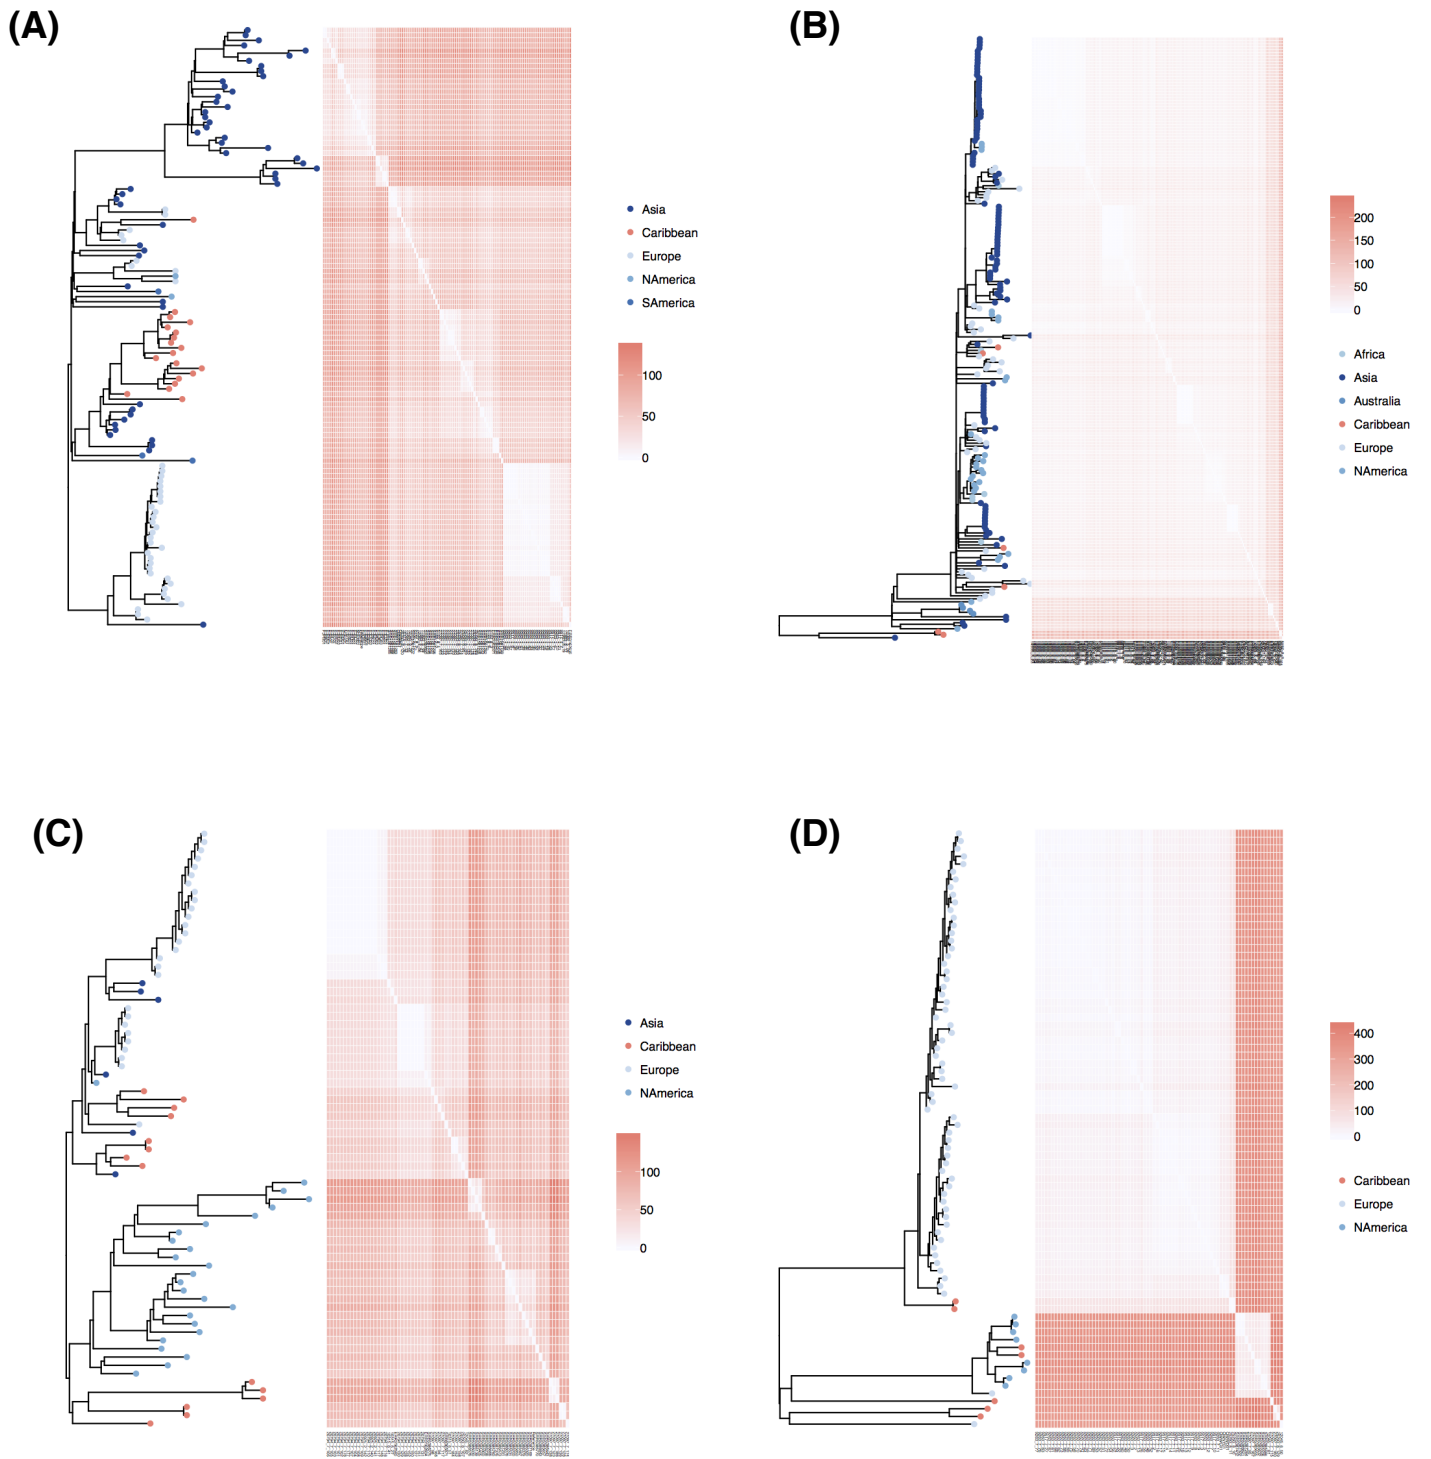

**Figure S5: Comparison of two meningitis cases in the Caribbean.** The mapping tree shows the two cases ([61], this study) in the context of other isolates. The core genome tree alignment was used to calculate pairwise SNP distances as in Figure S4 (middle panel), and the presence or absence of *K. pneumoniae*-specific virulence determinants associated with invasive disease [5] is shown on the right panel.

Figure S5

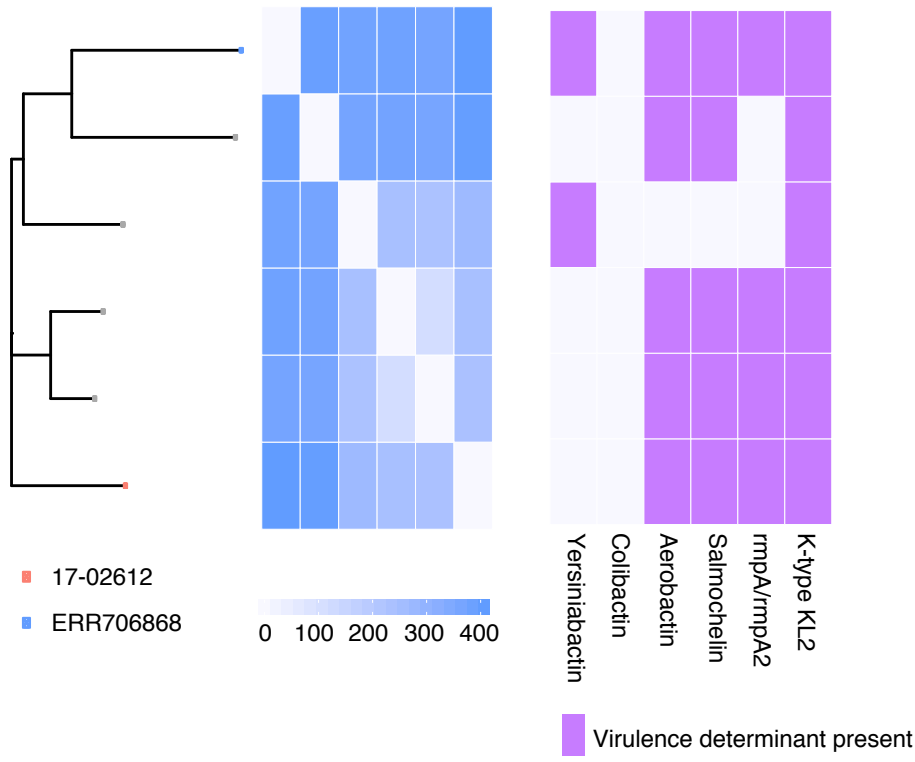

**Figure S6: Capsule (K-) and LPS O-antigen (O-type) genotype distribution in all isolates.**

Figure S6

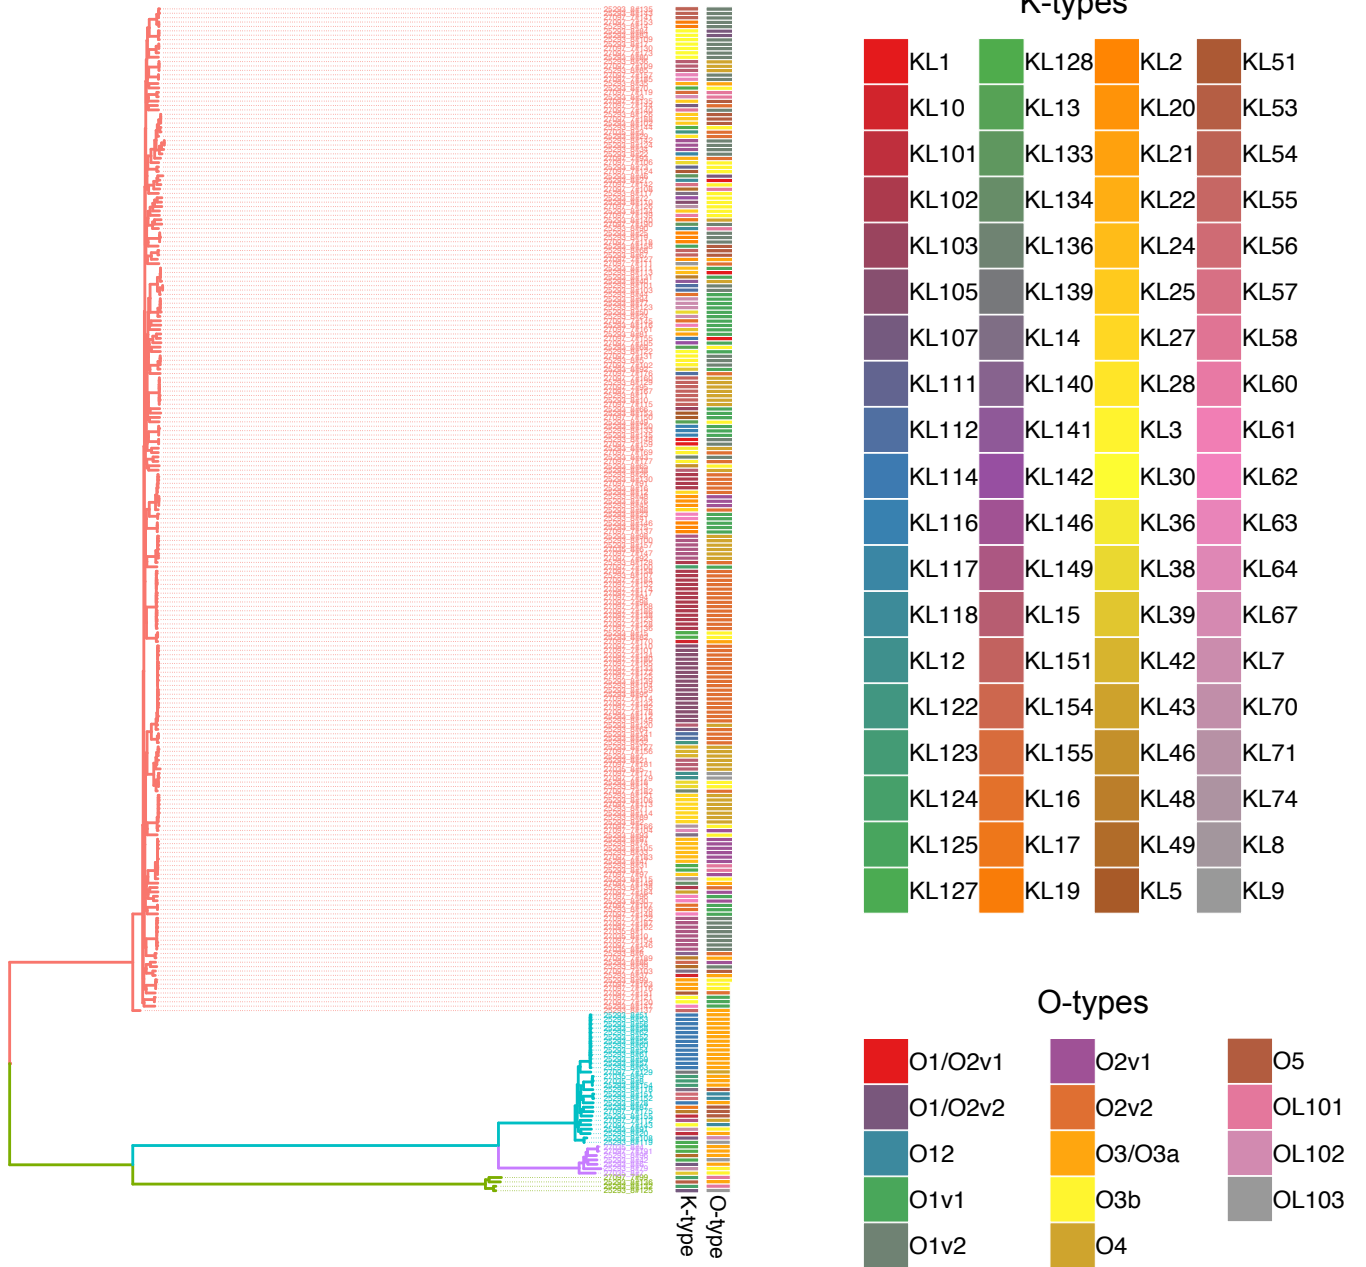

Supplement: mgen-5-266-s001.pdf [file mgen-5-266-s001.pdf]
